# Supplementary material
Source: publisher figshare collection journal article supplement (https://tandf.figshare.com/ndownloader/files/18090488)
Supplement: Supplementary file 1 [file 18090488]

Supporting Information

**A Convenient Route to Synthesize  $N^2$ -(Isobutyryl)-9-(carboxymethyl)guanine for *aeg*-PNA backbone**

Dhrubajyoti Datta<sup>a\*</sup>

<sup>a</sup>Department of Chemistry, Chemical Biology Unit, Indian Institute of Science Education and Research Pune,  
Dr. Homi Bhabha Road, Pune 411008, India

**Table of Contents**

| <b>Contents</b>                                                                    | <b>Page No</b> |
|------------------------------------------------------------------------------------|----------------|
| <sup>1</sup> H-/ <sup>13</sup> C -NMR and HRMS of <b>6</b>                         | <b>S-2</b>     |
| <sup>1</sup> H-/ <sup>13</sup> C -NMR and HRMS of <b>7</b>                         | <b>S-4</b>     |
| <sup>1</sup> H-/ <sup>13</sup> C -NMR and HRMS of <b>1</b> from modified procedure | <b>S-6</b>     |
| <sup>1</sup> H-/ <sup>13</sup> C -NMR and HRMS of <b>1</b> from reported procedure | <b>S-8</b>     |
| <sup>1</sup> H-/ <sup>13</sup> C -NMR and HRMS of <b>8</b>                         | <b>S-10</b>    |
| <sup>1</sup> H-/ <sup>13</sup> C -NMR and HRMS of <b>9</b>                         | <b>S-12</b>    |
| Partial NOESY spectrum of <b>9</b>                                                 | <b>S-14</b>    |
| Solid state peptide synthesis using G-PNA monomer <b>9</b>                         | <b>S-15</b>    |
| Single crystal structures of <b>6</b> and <b>7</b>                                 | <b>S-17</b>    |

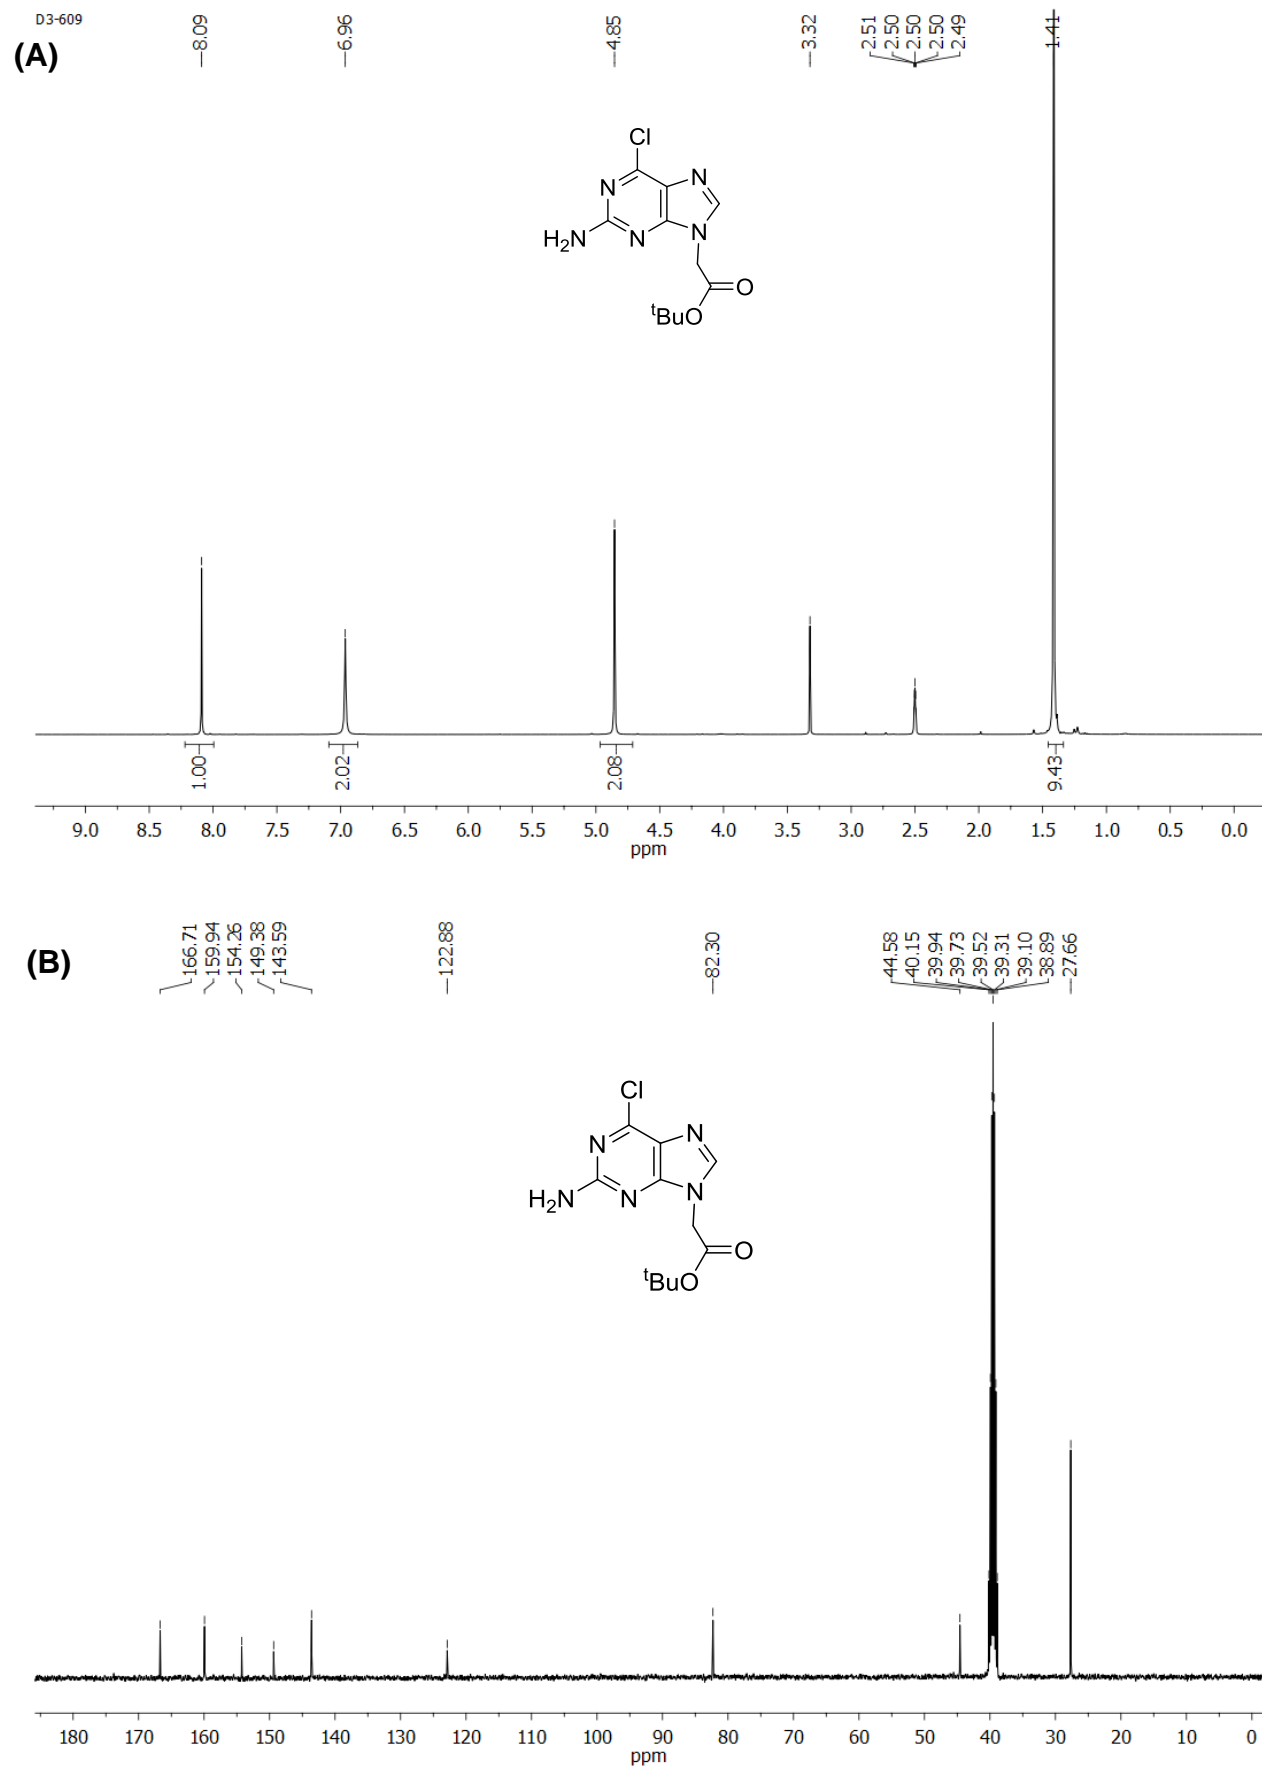

Figure S1: (A)  $^1\text{H}$  and (B)  $^{13}\text{C}$  NMR of **6**

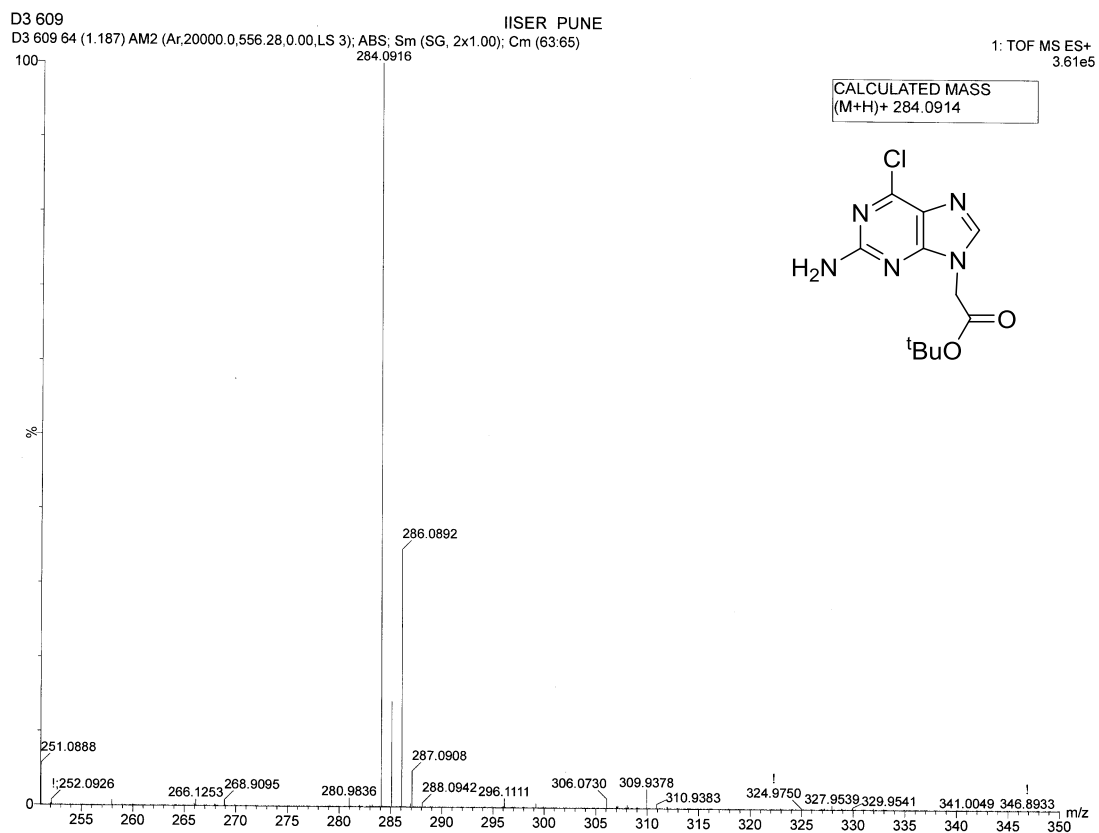

**Figure S2: HRMS data of 6**

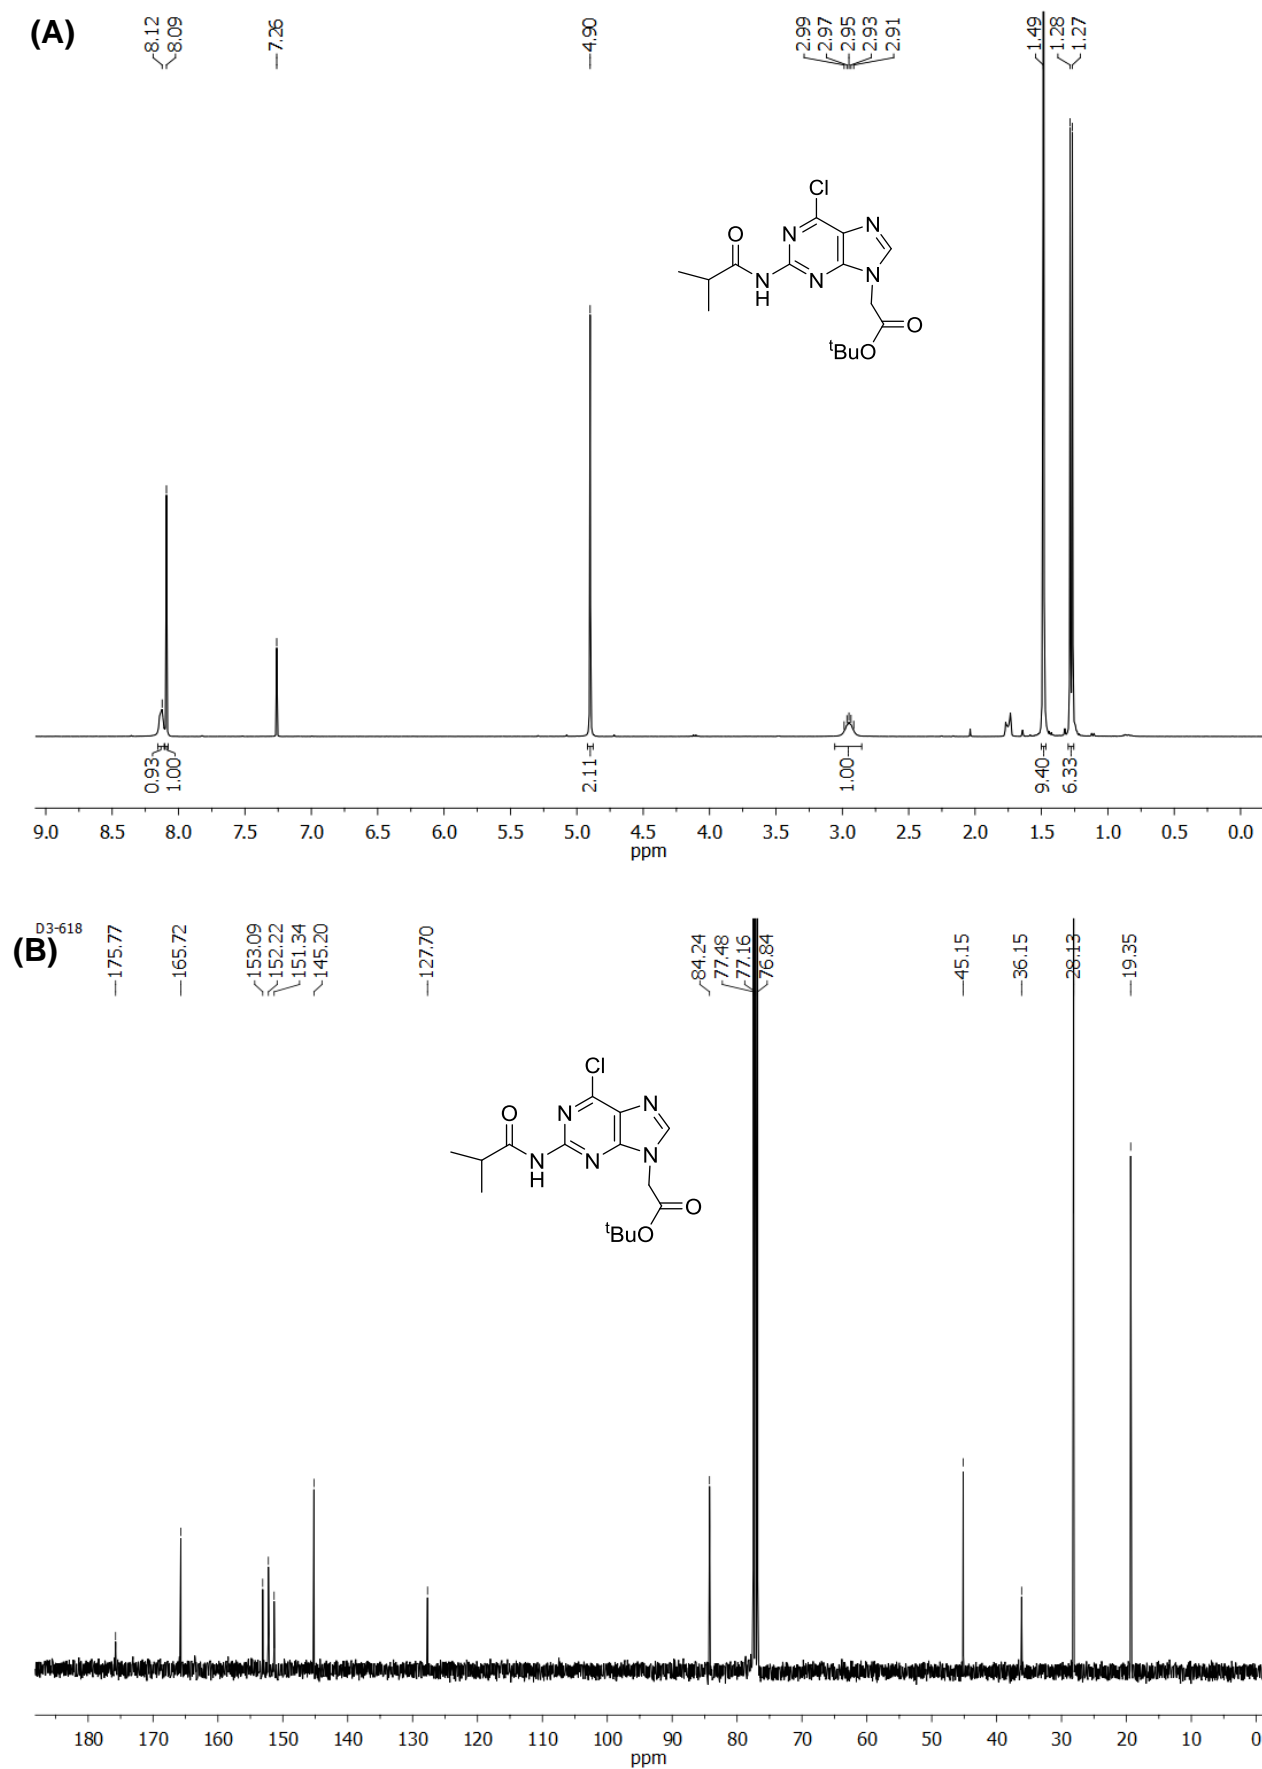

Figure S3: (A)  $^1\text{H}$  and (B)  $^{13}\text{C}$  NMR of **7**

D3 618  
D3 618 78 (1.445) AM2 (Ar, 20000.0, 556.28, 0.00, LS 3); ABS; Sm (SG, 2x1.00); Cm (78:79-(2:77+80:273))

1: TOF MS ES+  
2.35e5

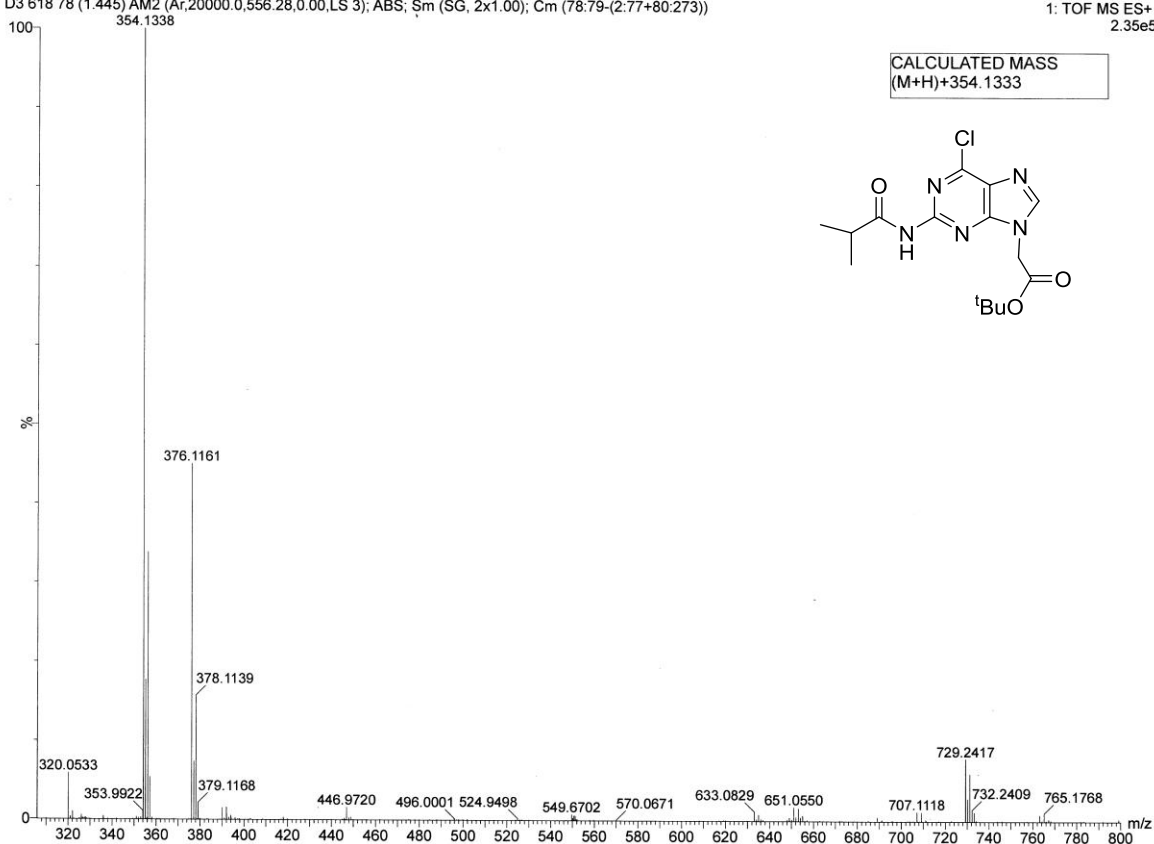

**Figure S4: HRMS data of 7**

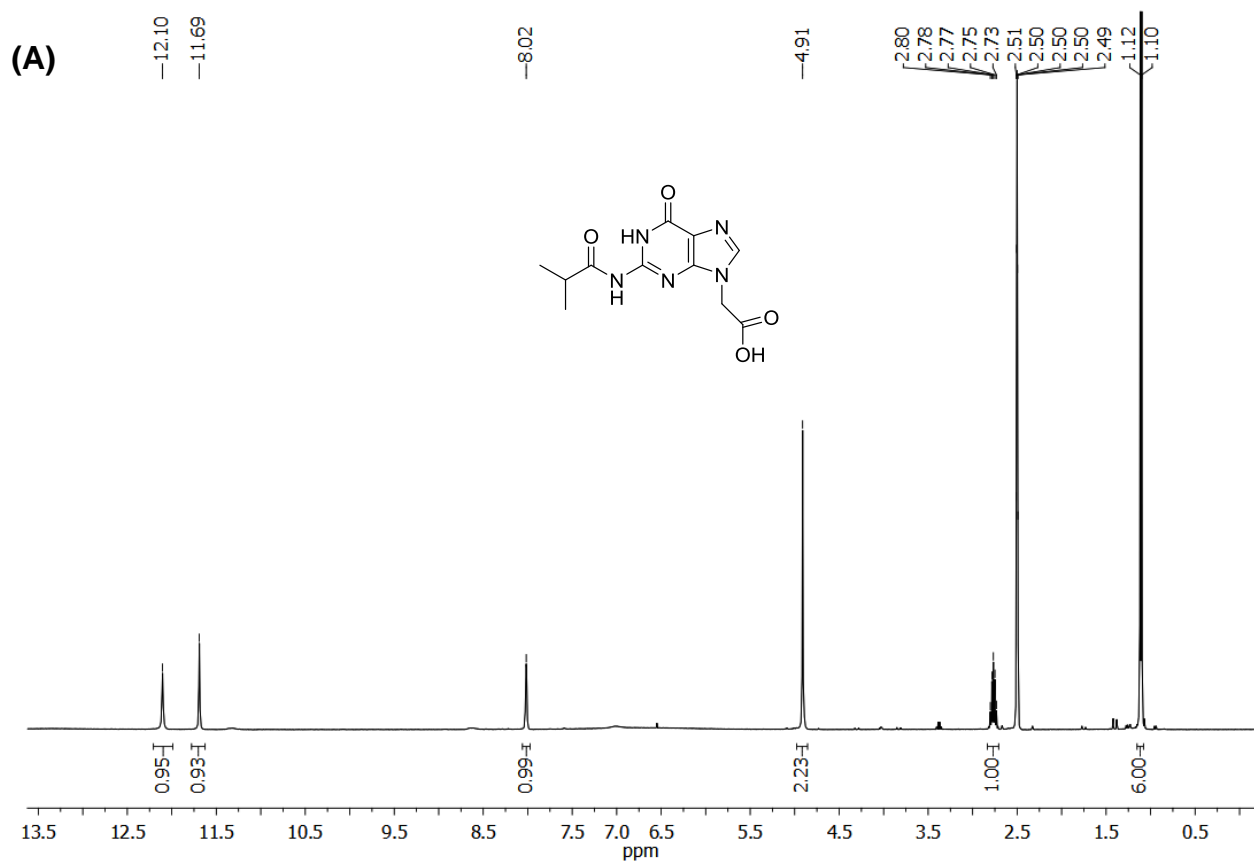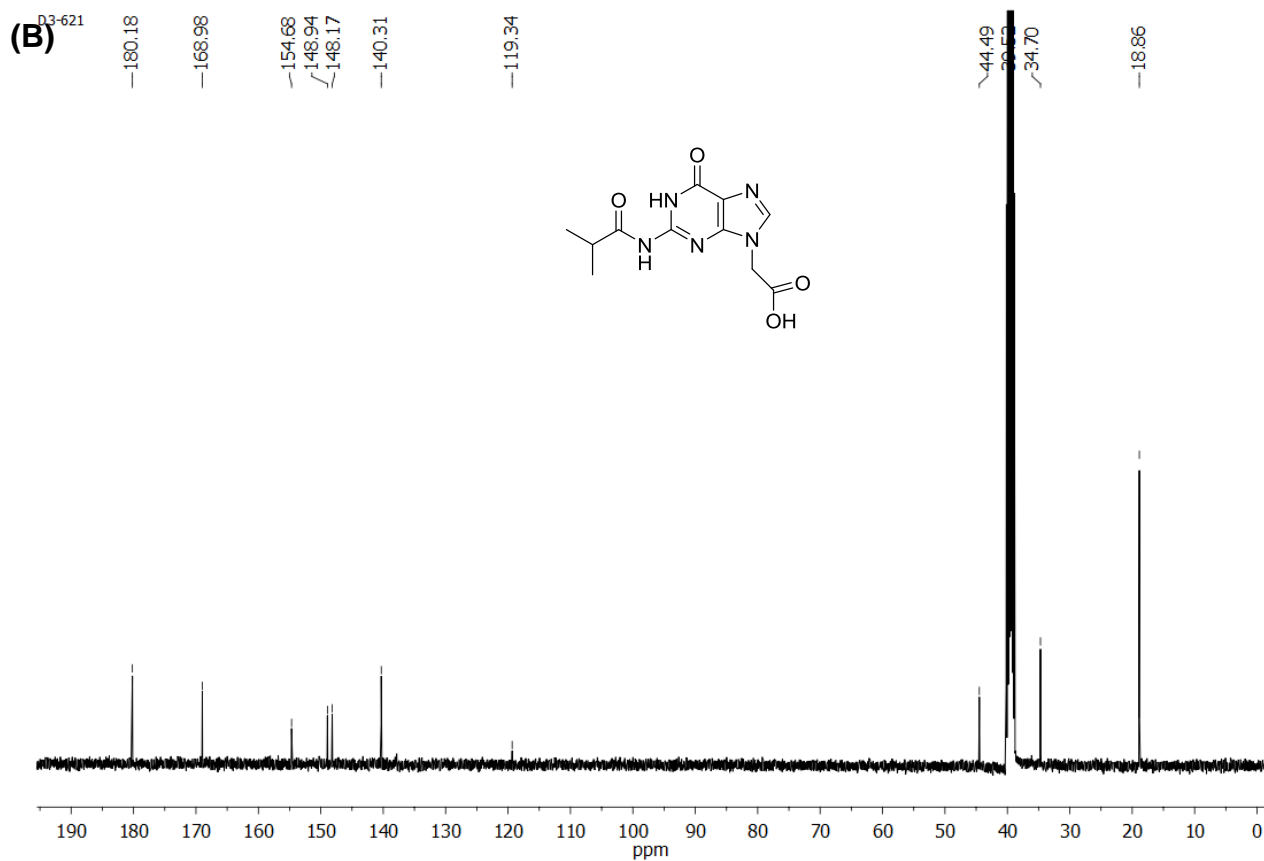

Figure S5: (A)  $^1\text{H}$  and (B)  $^{13}\text{C}$  NMR of **1**

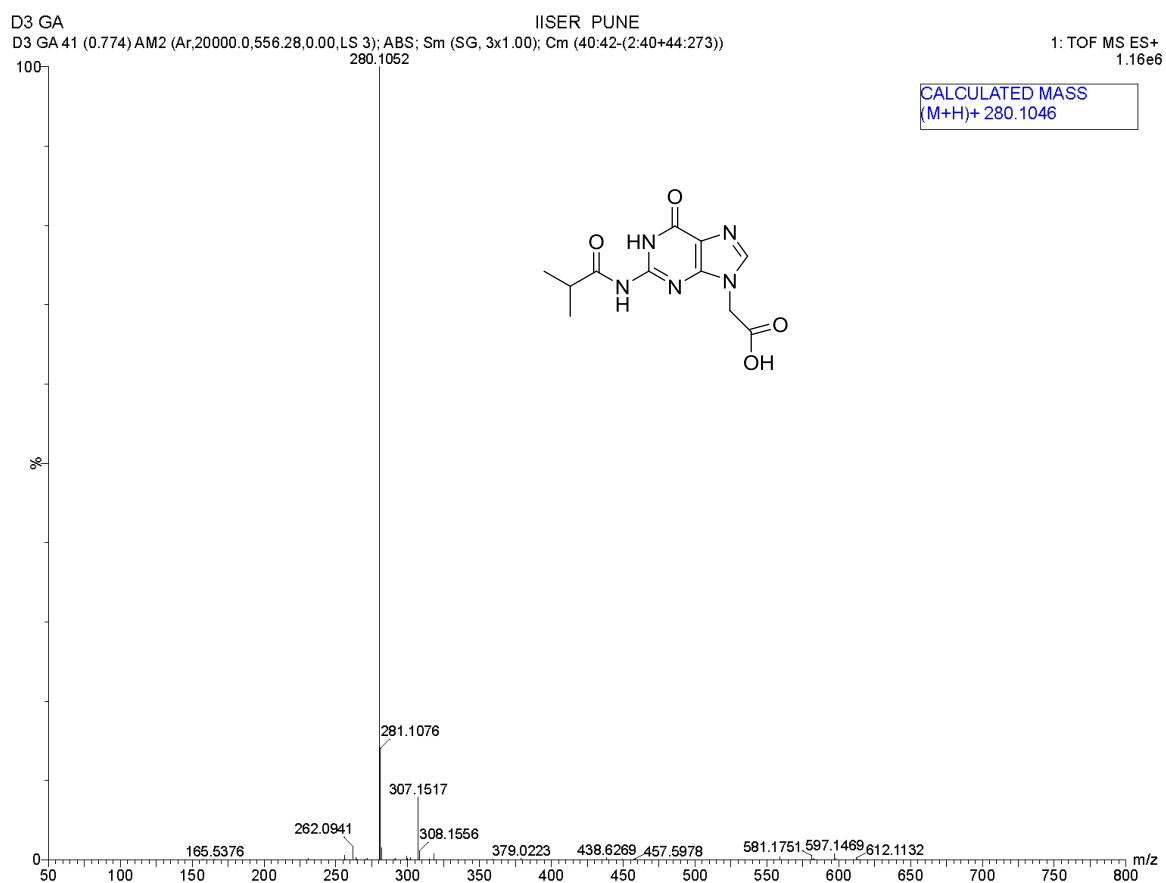

**Figure S6: HRMS data of 1**

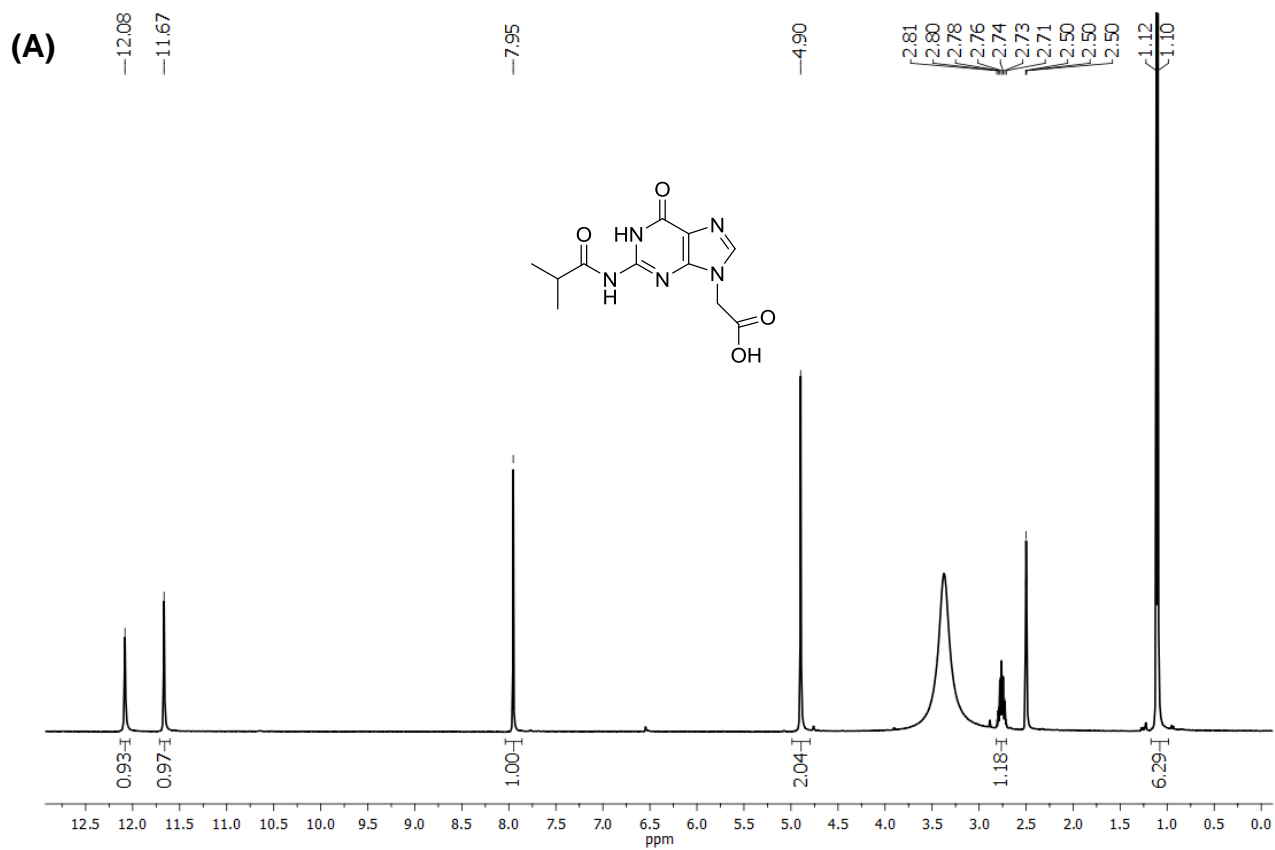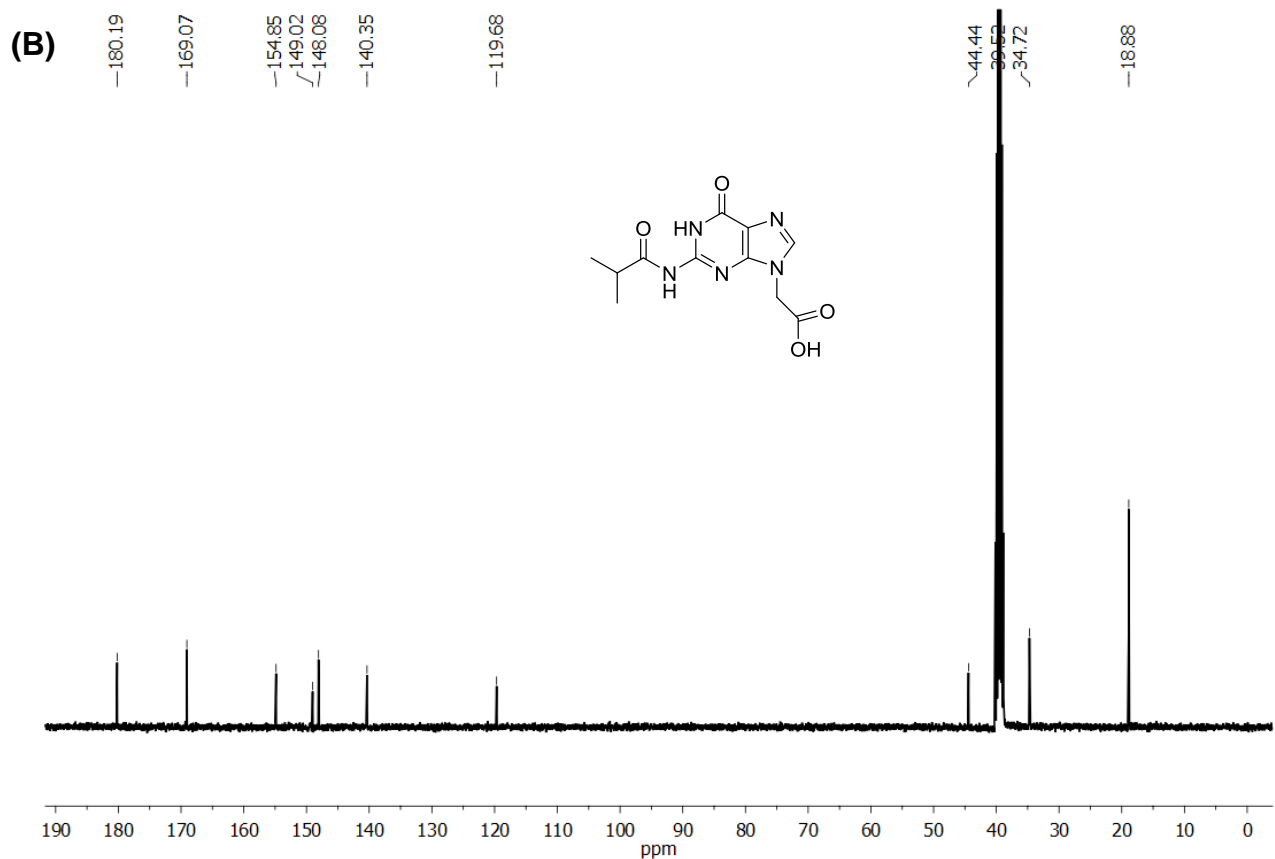

**Figure S7: (A) <sup>1</sup>H and (B) <sup>13</sup>C NMR of 1**



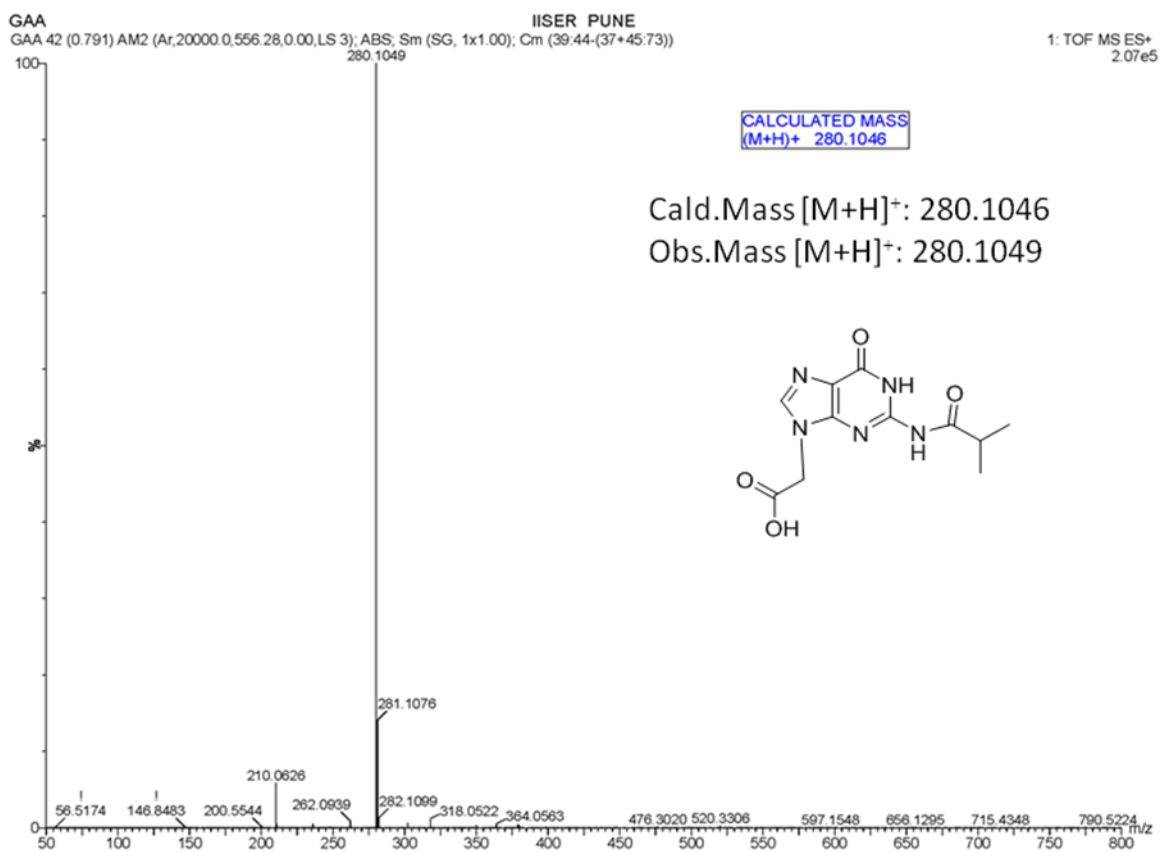

**Figure S8:** HRMS data of **1**

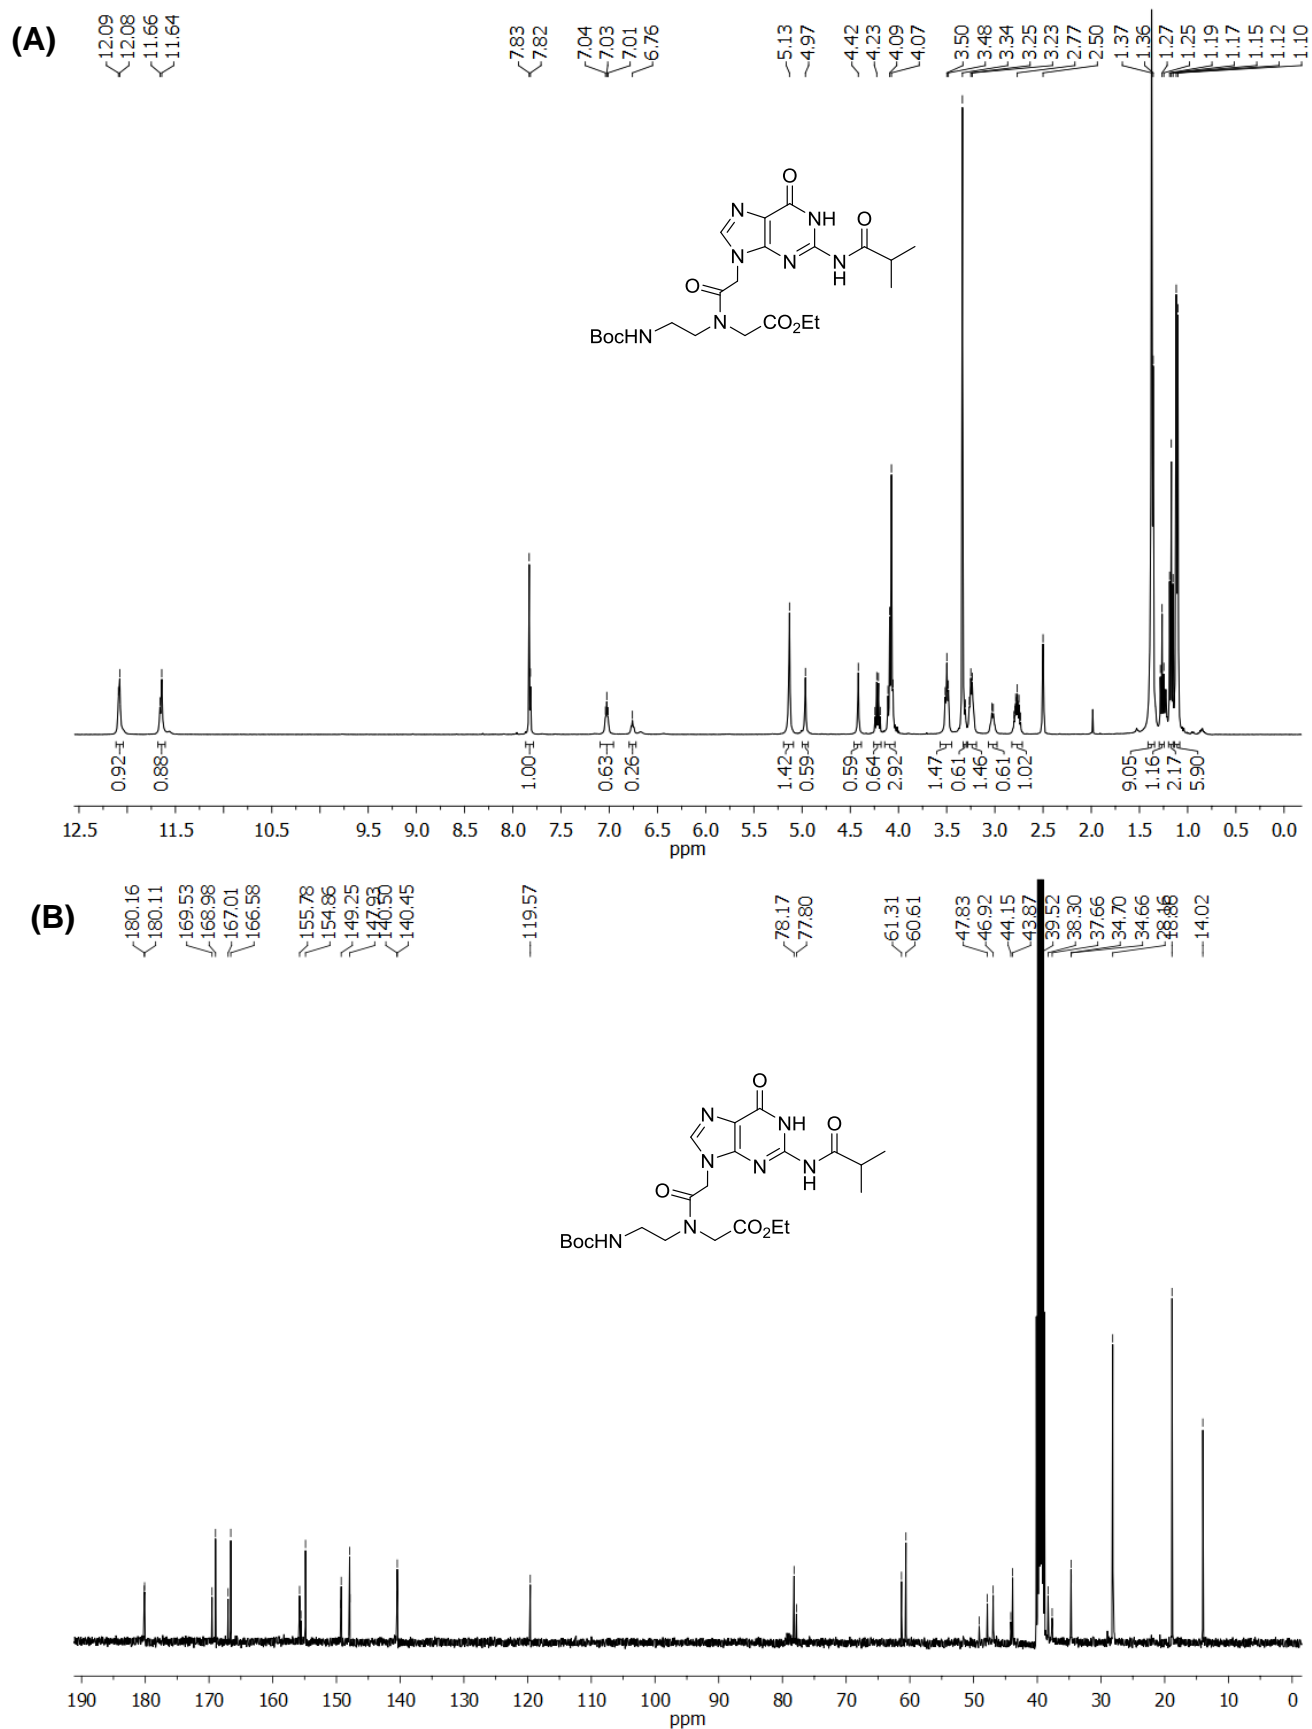

**Figure S9: (A) <sup>1</sup>H and (B) <sup>13</sup>C NMR of **8****

D3 629  
D3 629 76 (1.411) AM2 (Ar,20000.0,556.28,0.00,LS 3); ABS; Sm (SG, 2x1.00); Cm (75:77-(2.74+78.273))

IISER PUNE

1: TOF MS ES+  
8.48e6

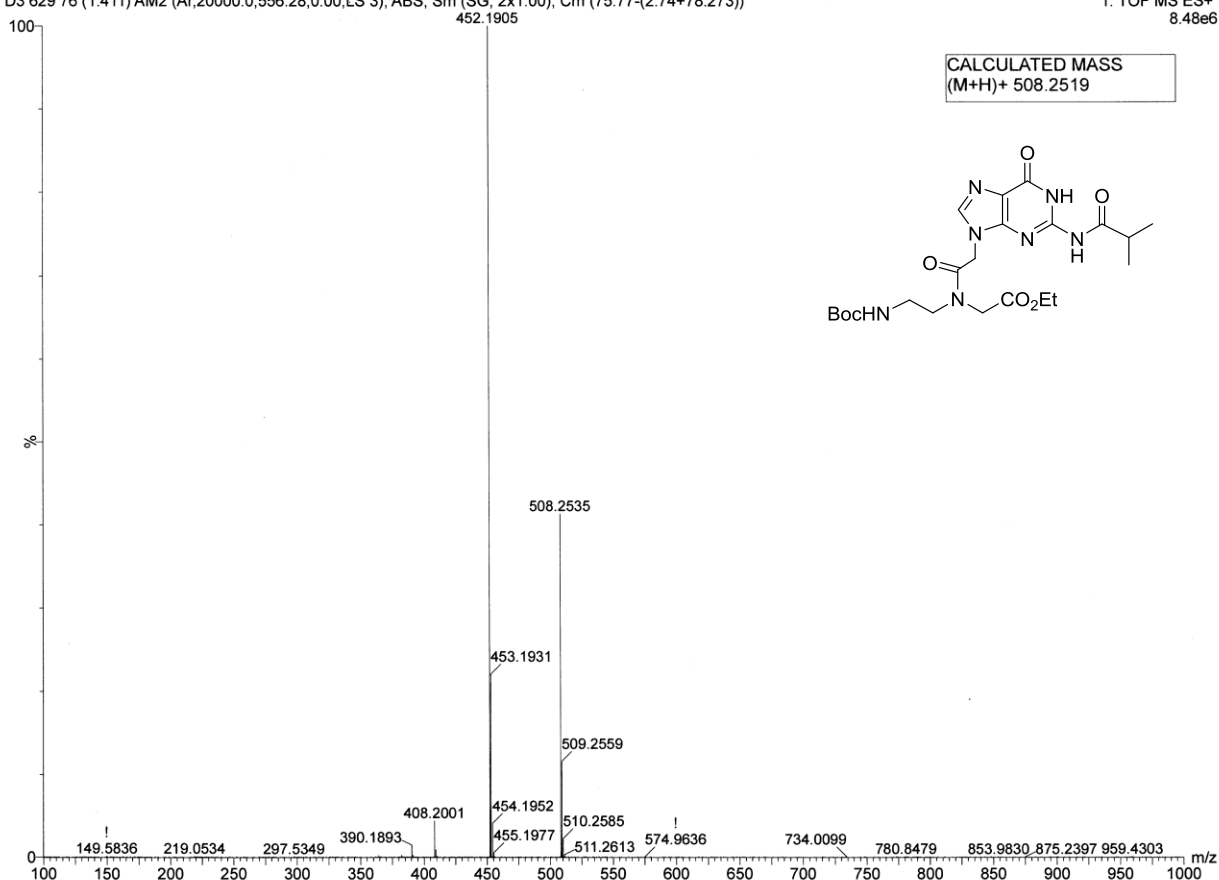

Figure S10: HRMS data of **8**

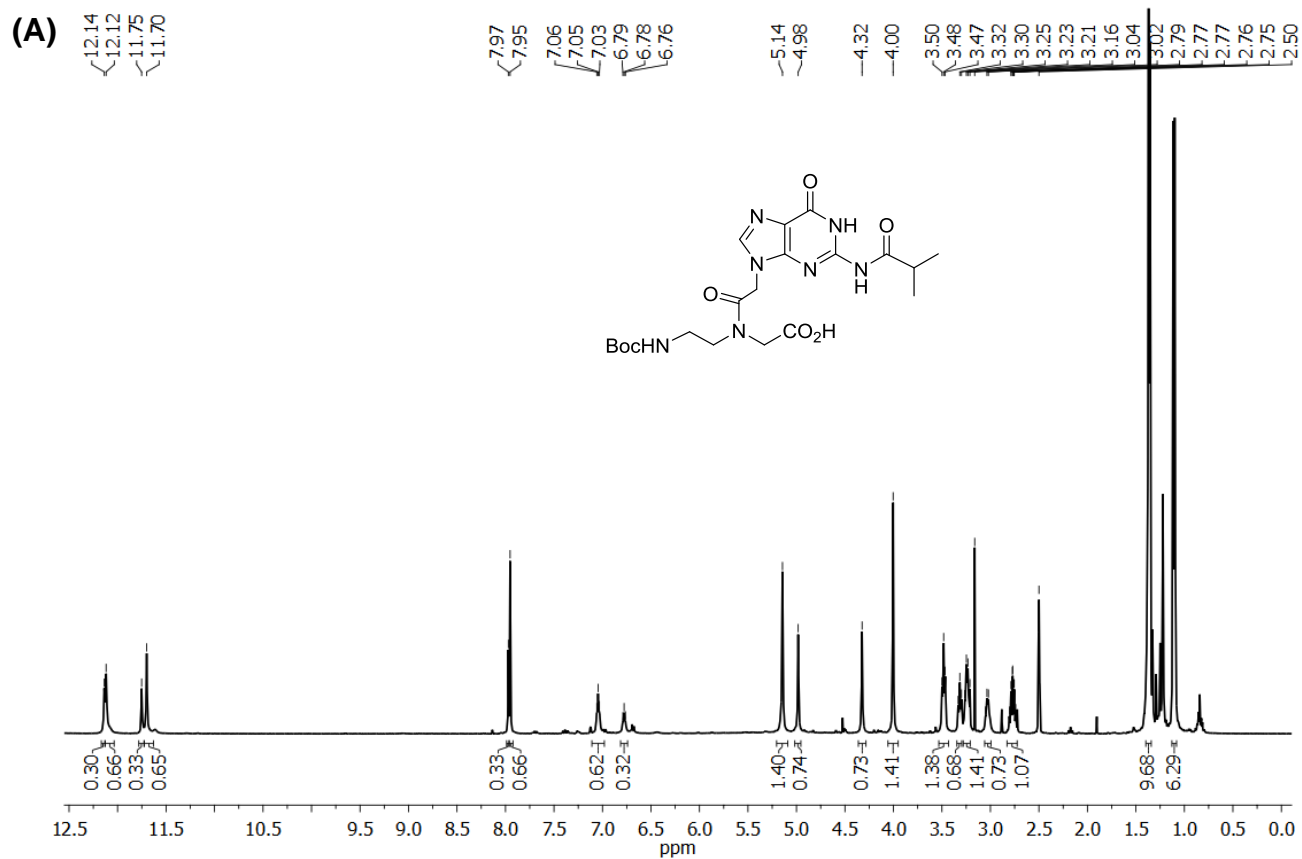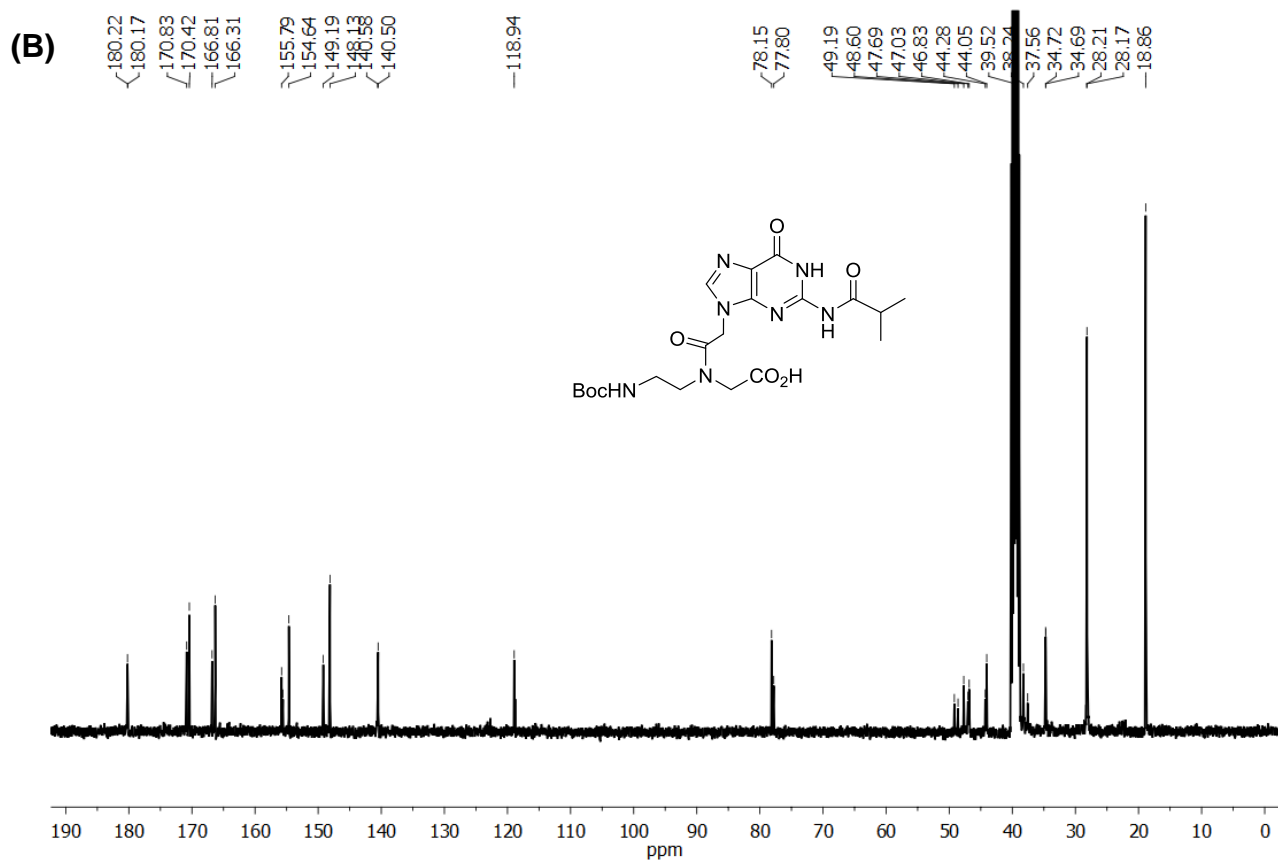

**Figure S11: (A) <sup>1</sup>H and (B) <sup>13</sup>C NMR of **9****

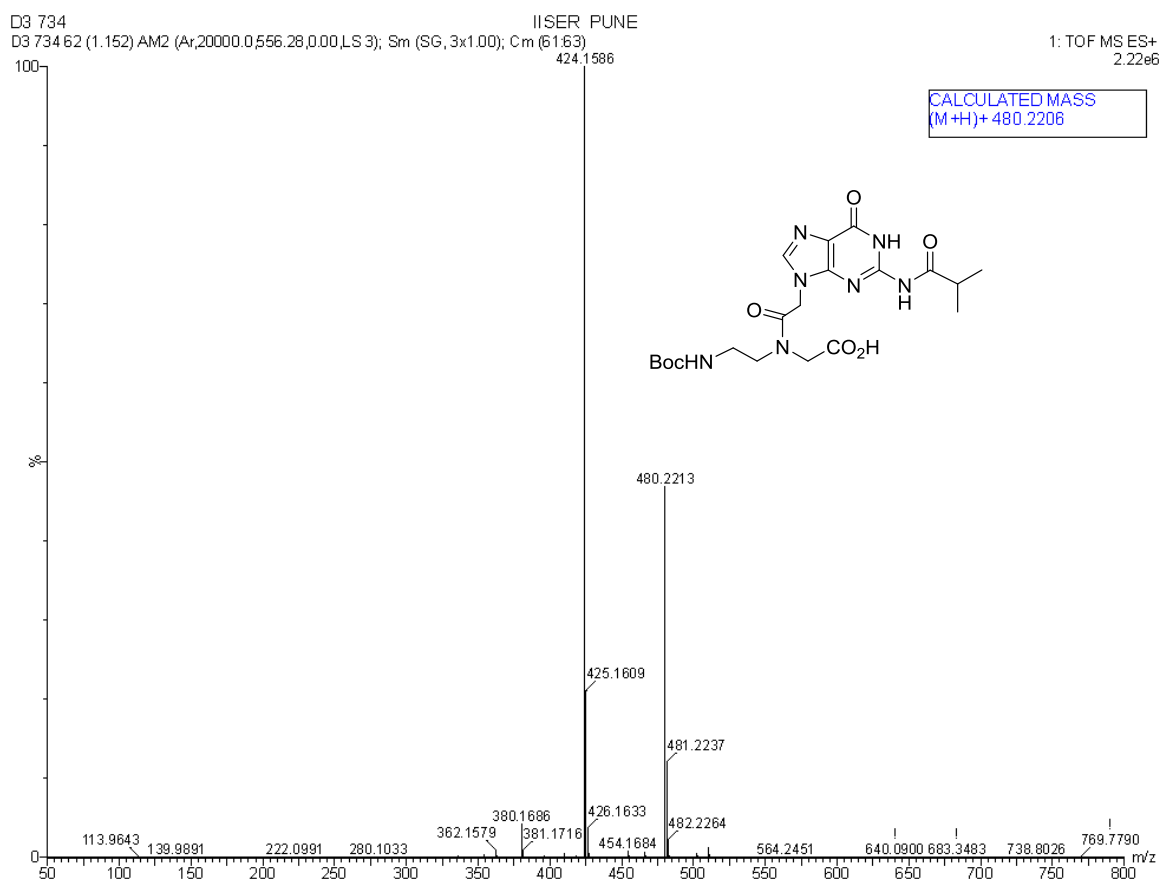

**Figure S12: HRMS data of 9**

**Two Dimensional (2D) NMR spectroscopy:** 2D NMR spectroscopy study was carried out by using Bruker 400 MHz spectrometer in DMSO- $d_6$  solvent. Resonance assignments were obtained by NOESY analysis. 2D data was collected in phasesensitive mode by using the time-proportional phase incrementation (TPPI) method. Sets of 2048 and 512 data points were used in the  $t_2$  and  $t_1$  dimensions, respectively. A spectral width of 9014.42 Hz was used in both dimensions. Spin-lock time used was 250 ms to obtain NOESY spectra. Zero filling was carried out to finally yield a data set of 2 K x 1 K. A shifted square-sine-bell window was used before processing.

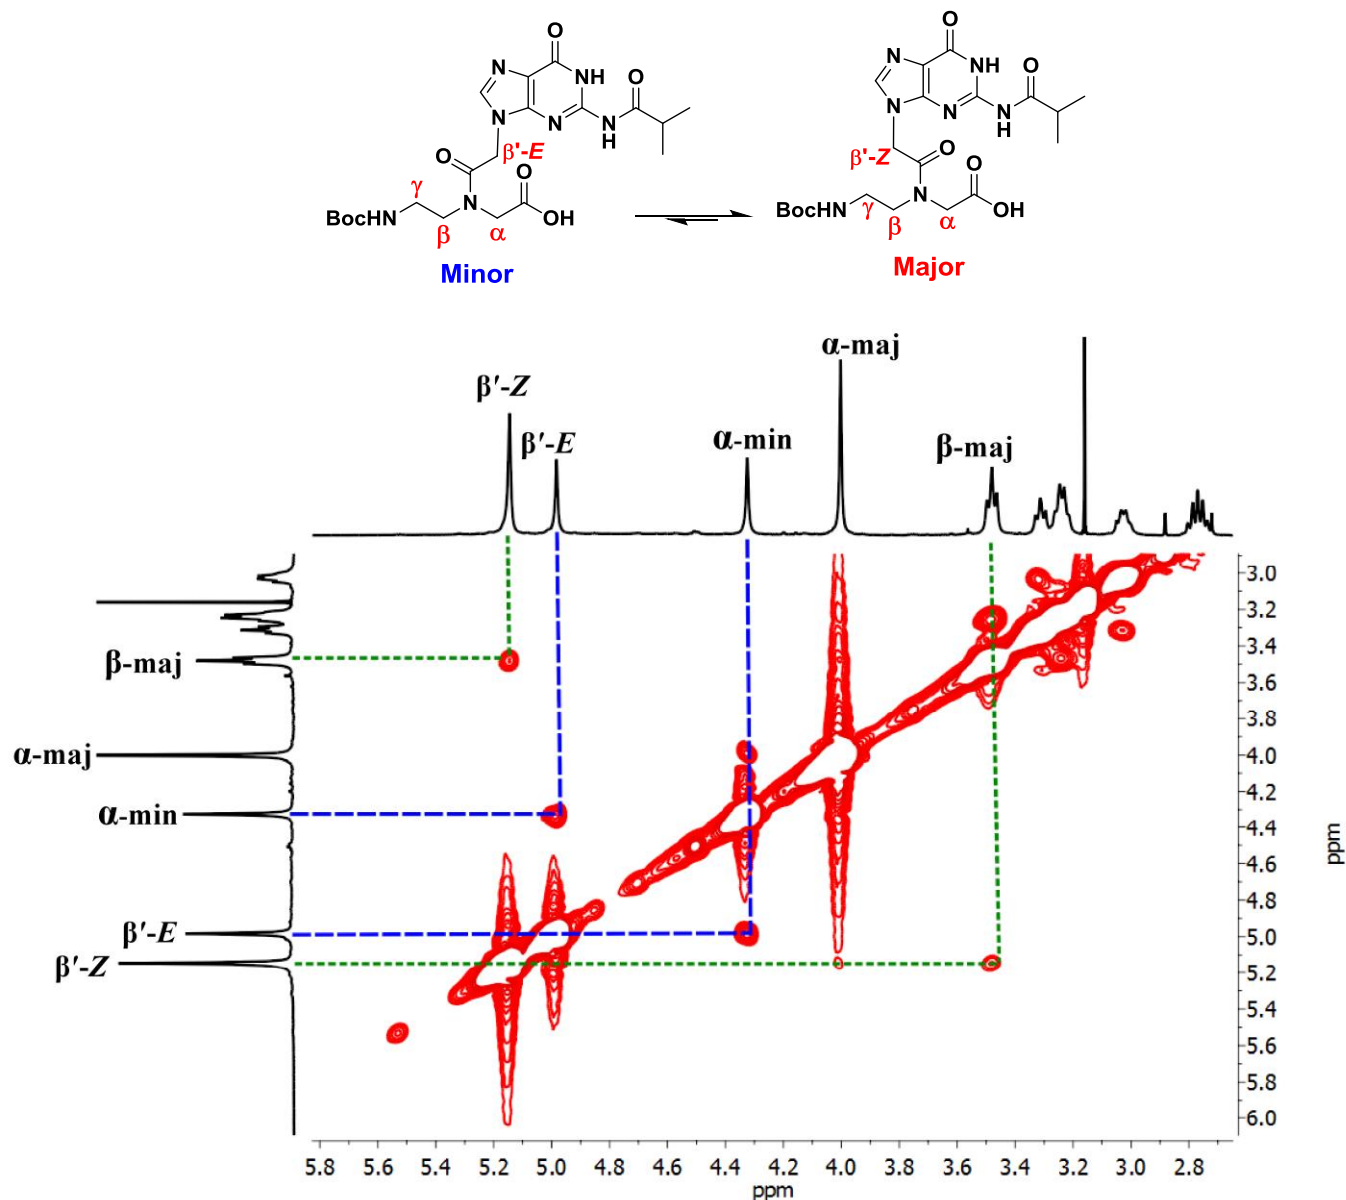

**Figure S13:** Partial NOESY of **9** in 400 MHz NMR shows major Z-rotamer in DMSO- $d_6$



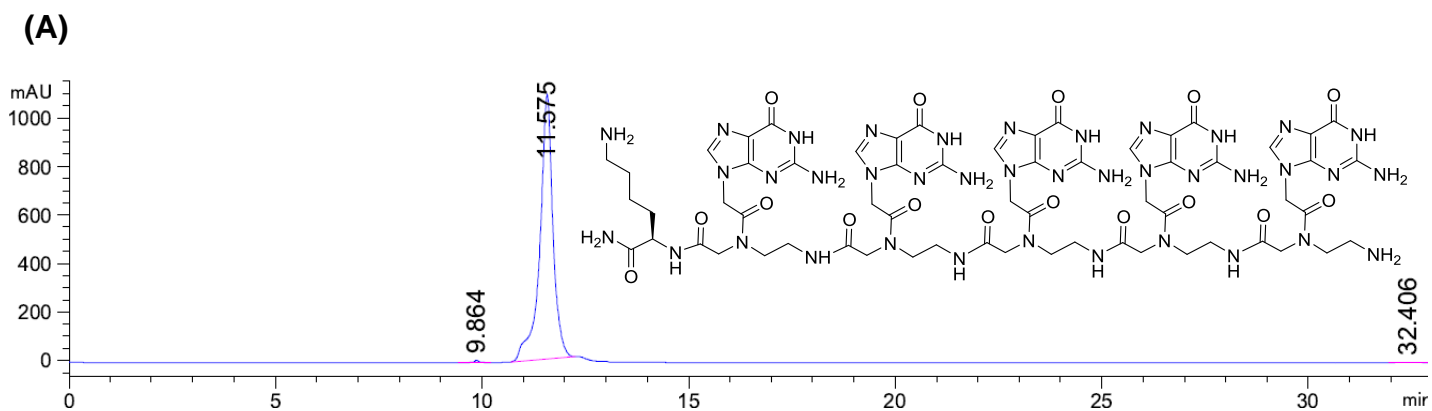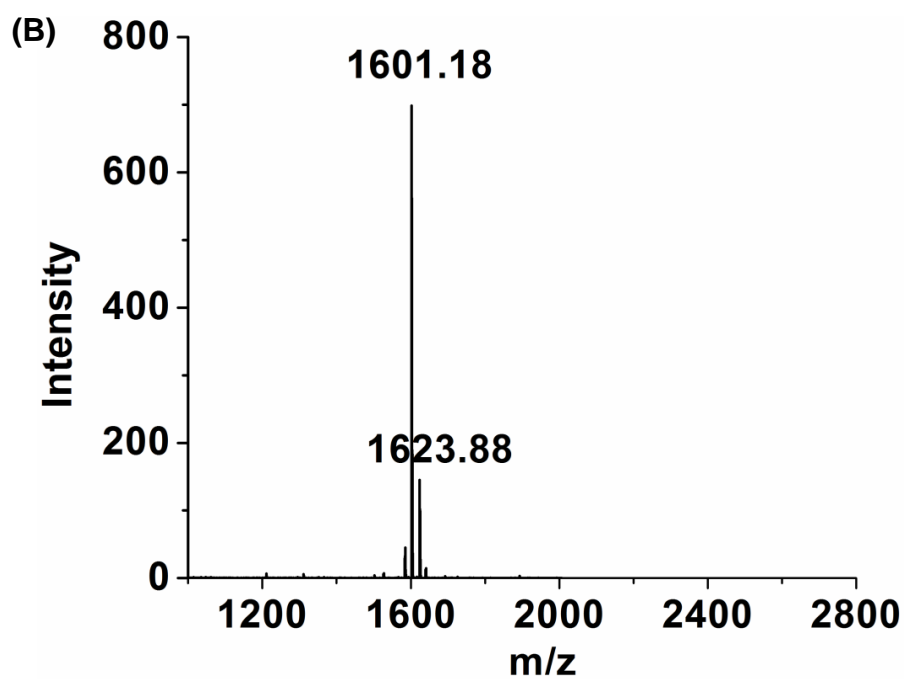

| Sequence of oligomer                                     | Mol. Formulae                                                   | Calcd. Mass (M+H) | Obsd. Mass (M+H) |
|----------------------------------------------------------|-----------------------------------------------------------------|-------------------|------------------|
| <b>pG<sub>5</sub></b> (H-G-G-G-G-G-Lys-NH <sub>2</sub> ) | C <sub>61</sub> H <sub>80</sub> N <sub>38</sub> O <sub>16</sub> | 1601.67           | 1601.18          |

**Figure S15:** (A) HPLC trace, and (C) MALDI ToF mass of desired peptide **pG<sub>5</sub>**.



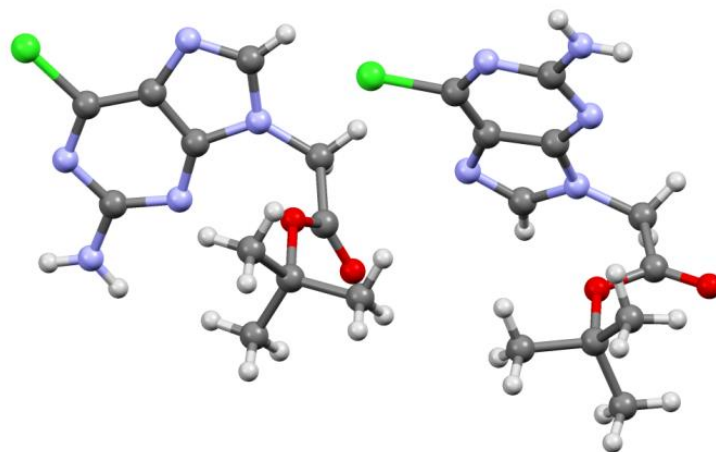

**Figure S16:** Crystal structure of *tert*-butyl(2-amino-6-chloropurin-9-yl)acetate **6** showing N9 isomer (CCDC 1880599).

Crystallographic data of **6**

|                 |                                               |                    |
|-----------------|-----------------------------------------------|--------------------|
| Bond precision: | C-C = 0.0060 Å                                | Wavelength=0.71073 |
| Cell:           | a=10.9111(12)    b=21.694(2)    c=11.4134(13) |                    |
|                 | alpha=90    beta=94.773(4)    gamma=90        |                    |
| Temperature:    | 296 K                                         |                    |
|                 | Calculated                                    | Reported           |
| Volume          | 2692.2(5)                                     | 2692.3(5)          |
| Space group     | P 21/c                                        | P 21/c             |
| Hall group      | -P 2ybc                                       | -P 2ybc            |
| Moiety formula  | C11 H14 Cl N5 O2                              | -                  |
| Sum formula     | C11 H14 Cl N5 O2                              | C11 H14 Cl N5 O2   |
| Mr              | 283.72                                        | 283.72             |
| Dx,g cm-3       | 1.400                                         | 1.400              |
| Z               | 8                                             | 8                  |
| Mu (mm-1)       | 0.290                                         | 0.290              |
| F000            | 1184.0                                        | 1184.0             |
| F000'           | 1185.59                                       |                    |
| h,k,lmax        | 14,28,15                                      | 14,28,15           |
| Nref            | 6723                                          | 6723               |

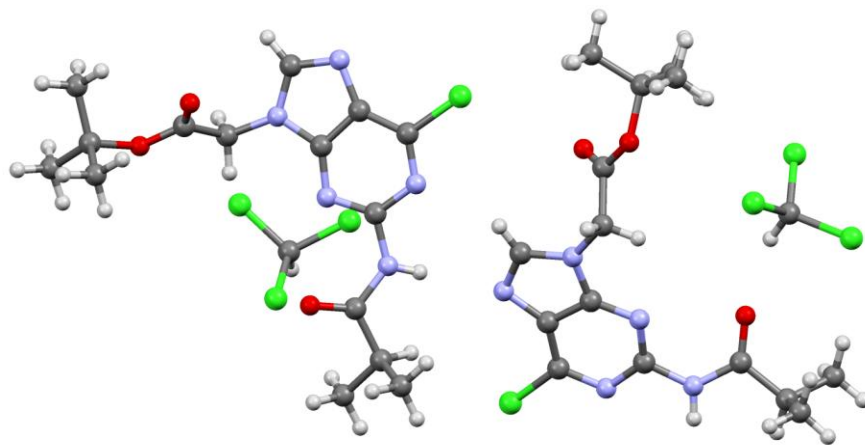

**Figure S17:** Crystal structure of *tert*-butyl[2-(isobutyryl)amino-6-chloropurin-9-yl]acetate **7** showing N9 isomer (CCDC 1880600).

Crystallographic data of **7**

|                        |                                                                                        |                                                                               |                    |
|------------------------|----------------------------------------------------------------------------------------|-------------------------------------------------------------------------------|--------------------|
| Bond precision:        | C-C = 0.0042 Å                                                                         |                                                                               | Wavelength=0.71073 |
| Cell:                  | a=10.7765(11)                                                                          | b=14.4165(12)                                                                 | c=15.4237(15)      |
|                        | alpha=104.294(3)                                                                       | beta=108.872(3)                                                               | gamma=90.842(3)    |
| Temperature:           | 296 K                                                                                  |                                                                               |                    |
|                        | Calculated                                                                             | Reported                                                                      |                    |
| Volume                 | 2185.5(4)                                                                              | 2185.5(4)                                                                     |                    |
| Space group            | P -1                                                                                   | P -1                                                                          |                    |
| Hall group             | -P 1                                                                                   | -P 1                                                                          |                    |
| Moiety formula         | C <sub>15</sub> H <sub>20</sub> Cl N <sub>5</sub> O <sub>3</sub> , C H Cl <sub>3</sub> | -                                                                             |                    |
| Sum formula            | C <sub>16</sub> H <sub>21</sub> Cl <sub>4</sub> N <sub>5</sub> O <sub>3</sub>          | C <sub>16</sub> H <sub>21</sub> Cl <sub>4</sub> N <sub>5</sub> O <sub>3</sub> |                    |
| Mr                     | 473.18                                                                                 | 473.18                                                                        |                    |
| Dx, g cm <sup>-3</sup> | 1.438                                                                                  | 1.438                                                                         |                    |
| Z                      | 4                                                                                      | 4                                                                             |                    |
| Mu (mm <sup>-1</sup> ) | 0.568                                                                                  | 0.568                                                                         |                    |
| F <sub>000</sub>       | 976.0                                                                                  | 976.0                                                                         |                    |
| F <sub>000</sub> '     | 978.68                                                                                 |                                                                               |                    |
| h,k,lmax               | 14,19,20                                                                               | 14,19,20                                                                      |                    |
| Nref                   | 10912                                                                                  | 10912                                                                         |                    |
